# Supplementary material for: Phenotypic and genetic characterisation of an emerging reovirus from Pekin ducks in China
Source: PubMed Central journal article supplement (PMC6533297; doi:10.1038/s41598-019-44178-3), 2019-05-23
Supplement: 41598_2019_44178_MOESM1_ESM.pdf [file 41598_2019_44178_MOESM1_ESM.pdf]

# Phenotypic and genetic characterisation of an emerging reovirus from Pekin ducks in China

Yanxin Cao<sup>1</sup>, Mengxu Sun<sup>1</sup>, Jun Wang<sup>1</sup>, Xueying Hu<sup>2\*</sup>, Weiyong He<sup>1</sup> & Jingliang Su<sup>1\*</sup>

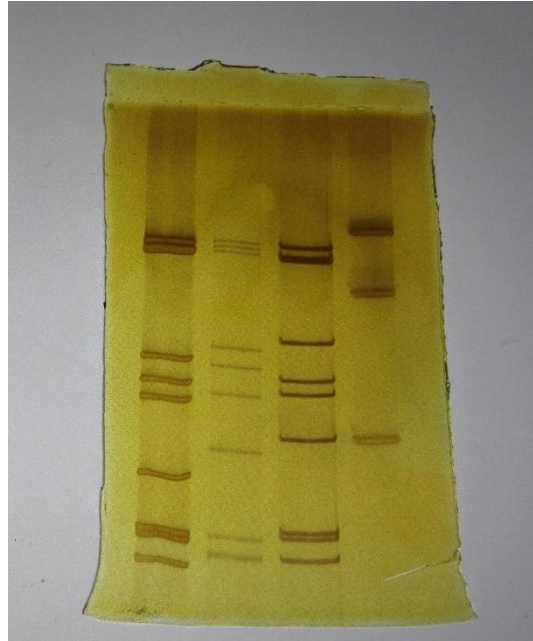

**Figure S1.** SDS-PAGE analysis of the genomic segment mobility of HC (a duck reovirus), Ych and S1133 (a chicken reovirus). Full-length gel of Figure 1c.

**Table S1.** Nucleotide and amino acid sequence identities of protein  $\lambda$ A of the isolate Ych to representative members of avian reovirus (%)

| Virus                       | 1    | 2    | 3    | 4    | 5    | 6    | 7    | 8    | 9    |
|-----------------------------|------|------|------|------|------|------|------|------|------|
| 1.S1133 <sup>a</sup>        | ***  | 85.0 | 77.5 | 78.1 | 78.1 | 77.8 | 78.0 | 72.3 | 72.7 |
| 2.D1246 <sup>b</sup>        | 96.6 | ***  | 77.4 | 77.9 | 77.6 | 78.2 | 77.9 | 72.5 | 72.1 |
| 3.ZJ00M <sup>c</sup>        | 94.7 | 94.8 | ***  | 94.4 | 86.8 | 86.2 | 87.1 | 71.4 | 71.6 |
| 4.HC <sup>c</sup>           | 94.3 | 94.4 | 99.0 | ***  | 86.4 | 86.5 | 86.9 | 71.8 | 72.0 |
| 5.03G <sup>c</sup>          | 94.4 | 94.3 | 98.0 | 97.7 | ***  | 89.9 | 89.1 | 72.4 | 72.2 |
| 6.ZJ2000M <sup>d</sup>      | 94.4 | 94.5 | 97.7 | 97.5 | 97.4 | ***  | 89.6 | 71.4 | 71.9 |
| 7.D20/99 <sup>d</sup>       | 94.0 | 94.2 | 97.3 | 97.0 | 97.3 | 96.9 | ***  | 71.5 | 71.5 |
| 8.D2533/6/1-10 <sup>e</sup> | 83.8 | 84.0 | 83.6 | 83.4 | 83.6 | 83.5 | 83.5 | ***  | 94.1 |
| 9.Ych <sup>e</sup>          | 84.5 | 84.5 | 84.2 | 83.8 | 84.0 | 84.1 | 83.9 | 98.1 | ***  |

<sup>a</sup>chicken (S1133, KF741756.1) origin ARV; <sup>b</sup>turkey (D1246, KR997909.1) origin ARV; <sup>c</sup>“novel” waterfowl origin ARVs: Muscovy duck (ZJ00M, KF154110.1), Pekin duck (HC) and Goose (03G, JX145328.1); <sup>d</sup>“classical” waterfowl origin ARVs: Muscovy duck (ZJ2000M, KF306082.1) and Goose (D20/99, KF809662.1); <sup>e</sup>new emerge duck reovirus: Pekin duck (D2533/6/1-10, MH520085.1; Ych, MK173029); The amino acid sequence identities were highlighted with the gray background.

**Table S2.** Nucleotide and amino acid sequence identities of protein  $\lambda$ B of the isolate Ych to representative members of avian reovirus (%)

| Virus                       | 1    | 2    | 3    | 4    | 5    | 6    | 7    | 8    | 9    |
|-----------------------------|------|------|------|------|------|------|------|------|------|
| 1.S1133 <sup>a</sup>        | ***  | 83.8 | 75.7 | 75.8 | 75.5 | 76.3 | 75.2 | 67.5 | 67.4 |
| 2.D1246 <sup>b</sup>        | 95.6 | ***  | 76.0 | 75.7 | 75.8 | 76.1 | 75.3 | 66.5 | 66.8 |
| 3.ZJ00M <sup>c</sup>        | 91.3 | 91.2 | ***  | 98.0 | 87.9 | 88.5 | 88.5 | 65.9 | 66.0 |
| 4.HC <sup>c</sup>           | 91.3 | 91.2 | 99.3 | ***  | 87.8 | 88.4 | 88.4 | 66.2 | 66.0 |
| 5.03G <sup>c</sup>          | 91.4 | 91.0 | 97.5 | 97.3 | ***  | 93.4 | 91.6 | 66.9 | 66.5 |
| 6.ZJ2000M <sup>d</sup>      | 91.7 | 91.1 | 98.3 | 98.3 | 97.6 | ***  | 93.0 | 66.7 | 66.3 |
| 7.D20/99 <sup>d</sup>       | 91.5 | 91.3 | 98.1 | 98.0 | 97.2 | 97.9 | ***  | 66.4 | 66.0 |
| 8.D2533/6/1-10 <sup>e</sup> | 75.6 | 74.8 | 75.1 | 75.0 | 75.2 | 75.3 | 74.8 | ***  | 91.7 |
| 9.Ych <sup>e</sup>          | 76.0 | 75.5 | 75.9 | 75.8 | 75.8 | 76.1 | 75.6 | 97.4 | ***  |

<sup>a</sup>chicken (S1133, KF741757.1) origin ARV; <sup>b</sup>turkey (D1246, KR997910.1) origin ARV; <sup>c</sup>“novel” waterfowl origin ARVs: Muscovy duck (ZJ00M, KF154111.1), Pekin duck (HC) and Goose (03G, JX145329.1); <sup>d</sup>“classical” waterfowl origin ARVs: Muscovy duck (ZJ2000M, KF306083.1) and Goose (D20/99, KF809663.1); <sup>e</sup>new emerge duck reovirus: Pekin duck (D2533/6/1-10, MH520086.1; Ych, MK173030); The amino acid sequence identities were highlighted with the gray background.

**Table S3.** Nucleotide and amino acid sequence identities of protein  $\lambda$ C of the isolate Ych to representative members of avian reovirus (%)

| Virus                       | 1    | 2    | 3    | 4    | 5    | 6    | 7    | 8    | 9    |
|-----------------------------|------|------|------|------|------|------|------|------|------|
| 1.S1133 <sup>a</sup>        | ***  | 71.7 | 70.1 | 70.1 | 70.0 | 69.9 | 69.4 | 55.3 | 56.0 |
| 2.D1246 <sup>b</sup>        | 82.0 | ***  | 70.3 | 70.3 | 70.1 | 70.3 | 69.5 | 55.6 | 55.7 |
| 3.ZJ00M <sup>c</sup>        | 79.5 | 79.7 | ***  | 98.4 | 96.8 | 79.9 | 78.9 | 56.7 | 56.2 |
| 4.HC <sup>c</sup>           | 79.4 | 79.6 | 99.7 | ***  | 97.5 | 80.3 | 79.2 | 56.8 | 56.2 |
| 5.03G <sup>c</sup>          | 79.2 | 79.1 | 98.6 | 98.8 | ***  | 80.4 | 79.4 | 56.9 | 56.4 |
| 6.ZJ2000M <sup>d</sup>      | 78.5 | 79.9 | 93.2 | 93.3 | 93.1 | ***  | 82.5 | 57.6 | 56.3 |
| 7.D20/99 <sup>d</sup>       | 78.3 | 79.5 | 92.2 | 92.4 | 92.3 | 92.2 | ***  | 56.9 | 56.5 |
| 8.D2533/6/1-10 <sup>e</sup> | 55.1 | 54.4 | 56.2 | 56.2 | 56.1 | 55.8 | 55.8 | ***  | 87.7 |
| 9.Ych <sup>e</sup>          | 54.9 | 54.6 | 55.9 | 56.0 | 55.8 | 55.6 | 55.4 | 94.9 | ***  |

<sup>a</sup>chicken (S1133, KF741758.1) origin ARV; <sup>b</sup>turkey (D1246, KR997911.1) origin ARV; <sup>c</sup>“novel” waterfowl origin ARVs: Muscovy duck (ZJ00M, KF154112.1), Pekin duck (HC) and Goose (03G, JX145330.1); <sup>d</sup>“classical” waterfowl origin ARVs: Muscovy duck (ZJ2000M, KF306084.1) and Goose (D20/99, KF809664.1); <sup>e</sup>new emerge duck reovirus: Pekin duck (D2533/6/1-10, MH520087.1; Ych, MK173031); The amino acid sequence identities were highlighted with the gray background.

**Table S4.** Nucleotide and amino acid sequence identities of protein  $\mu$ A of the isolate Ych to representative members of avian reovirus (%)

| Virus                       | 1    | 2    | 3    | 4    | 5    | 6    | 7    | 8    | 9    |
|-----------------------------|------|------|------|------|------|------|------|------|------|
| 1.S1133 <sup>a</sup>        | ***  | 87.9 | 73.6 | 73.6 | 73.6 | 72.9 | 73.6 | 60.1 | 59.5 |
| 2.D1246 <sup>b</sup>        | 95.4 | ***  | 74.1 | 74.1 | 74.1 | 72.7 | 73.2 | 60.3 | 60.3 |
| 3.ZJ00M <sup>c</sup>        | 86.6 | 86.4 | ***  | 97.9 | 96.4 | 81.0 | 79.9 | 60.2 | 60.5 |
| 4.HC <sup>c</sup>           | 86.2 | 86.4 | 98.4 | ***  | 97.0 | 81.0 | 80.4 | 60.3 | 60.5 |
| 5.03G <sup>c</sup>          | 86.2 | 86.1 | 97.0 | 97.8 | ***  | 80.9 | 80.1 | 60.4 | 60.7 |
| 6.ZJ2000M <sup>d</sup>      | 85.3 | 85.3 | 94.3 | 94.8 | 93.6 | ***  | 82.4 | 58.6 | 58.7 |
| 7.D20/99 <sup>d</sup>       | 85.4 | 84.9 | 90.7 | 91.5 | 90.6 | 91.7 | ***  | 58.6 | 58.4 |
| 8.D2533/6/1-10 <sup>e</sup> | 59.6 | 59.2 | 59.2 | 59.4 | 59.7 | 59.2 | 58.6 | ***  | 93.4 |
| 9.Ych <sup>e</sup>          | 61.1 | 60.6 | 60.8 | 61.1 | 61.1 | 61.0 | 60.4 | 93.3 | ***  |

<sup>a</sup>chicken (S1133, KF741759.1) origin ARV; <sup>b</sup>turkey (D1246, KR997912.1) origin ARV; <sup>c</sup>“novel” waterfowl origin ARVs: Muscovy duck (ZJ00M, KF154113.1), Pekin duck (HC) and Goose (03G, JX145331.1); <sup>d</sup>“classical” waterfowl origin ARVs: Muscovy duck (ZJ2000M, KF306085.1) and Goose (D20/99, KF809665.1); <sup>e</sup>new emerge duck reovirus: Pekin duck (D2533/6/1-10, MH520088.1; Ych, MK173032); The amino acid sequence identities were highlighted with the gray background.

**Table S5.** Nucleotide and amino acid sequence identities of protein  $\mu$ B of the isolate Ych to representative members of avian reovirus (%)

| Virus                       | 1    | 2    | 3    | 4    | 5    | 6    | 7    | 8    | 9    |
|-----------------------------|------|------|------|------|------|------|------|------|------|
| 1.S1133 <sup>a</sup>        | ***  | 75.5 | 76.7 | 76.5 | 76.2 | 69.3 | 68.9 | 64.8 | 64.8 |
| 2.D1246 <sup>b</sup>        | 88.0 | ***  | 76.5 | 76.1 | 75.7 | 67.4 | 67.1 | 64.3 | 65.2 |
| 3.ZJ00M <sup>c</sup>        | 89.6 | 89.9 | ***  | 98.2 | 87.9 | 67.6 | 67.8 | 65.2 | 65.8 |
| 4.HC <sup>c</sup>           | 89.5 | 89.8 | 99.0 | ***  | 88.4 | 67.4 | 67.7 | 65.1 | 65.7 |
| 5.03G <sup>c</sup>          | 88.9 | 89.4 | 96.0 | 96.2 | ***  | 67.7 | 67.5 | 65.9 | 65.9 |
| 6.ZJ2000M <sup>d</sup>      | 75.6 | 76.1 | 76.3 | 76.5 | 75.6 | ***  | 92.5 | 62.1 | 62.8 |
| 7.D20/99 <sup>d</sup>       | 75.2 | 75.9 | 76.3 | 76.2 | 75.3 | 96.9 | ***  | 61.9 | 62.5 |
| 8.D2533/6/1-10 <sup>e</sup> | 70.3 | 72.3 | 70.9 | 71.2 | 71.7 | 67.2 | 66.6 | ***  | 89.6 |
| 9.Ych <sup>e</sup>          | 70.0 | 72.1 | 71.2 | 71.5 | 72.0 | 66.9 | 66.5 | 98.5 | ***  |

<sup>a</sup>chicken (S1133, KF741760.1) origin ARV; <sup>b</sup>turkey (D1246, KR997913.1) origin ARV; <sup>c</sup>“novel” waterfowl origin ARVs: Muscovy duck (ZJ00M, KF154114.1), Pekin duck (HC) and Goose (03G, JX145332.1); <sup>d</sup>“classical” waterfowl origin ARVs: Muscovy duck (ZJ2000M, KF306086.1) and Goose (D20/99, KF809666.1); <sup>e</sup>new emerge duck reovirus: Pekin duck (D2533/6/1-10, MH520089.1; Ych, MK173033); The amino acid sequence identities were highlighted with the gray background.

**Table S6.** Nucleotide and amino acid sequence identities of protein  $\mu$ NS of the isolate Ych to representative members of avian reovirus (%)

| Virus                       | 1    | 2    | 3    | 4    | 5    | 6    | 7    | 8    | 9    |
|-----------------------------|------|------|------|------|------|------|------|------|------|
| 1.S1133 <sup>a</sup>        | ***  | 88.6 | 71.8 | 71.5 | 72.0 | 71.6 | 72.5 | 59.0 | 58.6 |
| 2.D1246 <sup>b</sup>        | 94.2 | ***  | 72.0 | 71.9 | 71.9 | 71.6 | 71.2 | 58.5 | 58.2 |
| 3.ZJ00M <sup>c</sup>        | 80.5 | 80.8 | ***  | 98.1 | 94.8 | 86.4 | 79.3 | 58.3 | 57.6 |
| 4.HC <sup>c</sup>           | 81.0 | 81.1 | 98.6 | ***  | 95.0 | 86.6 | 79.4 | 58.1 | 57.8 |
| 5.03G <sup>c</sup>          | 80.7 | 80.8 | 96.4 | 97.0 | ***  | 87.0 | 78.9 | 58.2 | 57.8 |
| 6.ZJ2000M <sup>d</sup>      | 80.5 | 81.0 | 93.7 | 94.0 | 93.9 | ***  | 78.7 | 58.8 | 58.2 |
| 7.D20/99 <sup>d</sup>       | 80.7 | 80.7 | 90.1 | 90.9 | 90.1 | 89.9 | ***  | 57.5 | 58.5 |
| 8.D2533/6/1-10 <sup>e</sup> | 56.5 | 57.3 | 56.0 | 56.6 | 56.5 | 55.8 | 57.1 | ***  | 92.1 |
| 9.Ych <sup>e</sup>          | 56.0 | 56.5 | 56.0 | 56.6 | 56.5 | 55.8 | 57.1 | 95.8 | ***  |

<sup>a</sup>chicken (S1133, KF741761.1) origin ARV; <sup>b</sup>turkey (D1246, KR997914.1) origin ARV; <sup>c</sup>“novel” waterfowl origin ARVs: Muscovy duck (ZJ00M, KF154115.1), Pekin duck (HC) and Goose (03G, JX145333.1); <sup>d</sup>“classical” waterfowl origin ARVs: Muscovy duck (ZJ2000M, KF306087.1) and Goose (D20/99, KF809667.1); <sup>e</sup>new emerge duck reovirus: Pekin duck (D2533/6/1-10, MH520090.1; Ych, MK173034); The amino acid sequence identities were highlighted with the gray background.

**Table S7.** Nucleotide and amino acid sequence identities of protein  $\sigma$ C of the isolate Ych to representative members of avian reovirus (%)

| Virus                       | 1    | 2    | 3    | 4    | 5    | 6    | 7    | 8    | 9    |
|-----------------------------|------|------|------|------|------|------|------|------|------|
| 1.S1133 <sup>a</sup>        | ***  | 61.0 | 39.1 | 39.3 | 39.0 | 35.6 | 34.9 | 42.5 | 43.6 |
| 2.D1246 <sup>b</sup>        | 57.2 | ***  | 40.0 | 40.6 | 40.3 | 36.5 | 36.5 | 41.1 | 40.7 |
| 3.ZJ00M <sup>c</sup>        | 28.6 | 27.0 | ***  | 97.3 | 97.4 | 52.0 | 50.7 | 41.7 | 40.7 |
| 4.HC <sup>c</sup>           | 28.6 | 27.0 | 97.5 | ***  | 97.8 | 51.7 | 51.2 | 42.0 | 40.9 |
| 5.03G <sup>c</sup>          | 28.3 | 27.4 | 97.5 | 98.8 | ***  | 52.4 | 51.3 | 41.4 | 40.4 |
| 6.ZJ2000M <sup>d</sup>      | 25.2 | 21.1 | 41.5 | 41.5 | 41.9 | ***  | 90.7 | 37.2 | 37.5 |
| 7.D20/99 <sup>d</sup>       | 25.9 | 22.6 | 41.1 | 41.1 | 41.5 | 91.9 | ***  | 37.2 | 37.3 |
| 8.D2533/6/1-10 <sup>e</sup> | 21.6 | 21.6 | 27.6 | 27.0 | 27.0 | 24.4 | 24.8 | ***  | 85.5 |
| 9.Ych <sup>e</sup>          | 22.2 | 22.2 | 27.3 | 26.7 | 26.7 | 25.2 | 24.8 | 91.7 | ***  |

<sup>a</sup>chicken (S1133, KF741762.1) origin ARV; <sup>b</sup>turkey (D1246, KR997915.1) origin ARV; <sup>c</sup>“novel” waterfowl origin ARVs: Muscovy duck (ZJ00M, KF154116.1), Pekin duck (HC) and Goose (03G, JX145334.1); <sup>d</sup>“classical” waterfowl origin ARVs: Muscovy duck (ZJ2000M, KF306091.1) and Goose (D20/99, KF809668.1); <sup>e</sup>new emerge duck reovirus: Pekin duck (D2533/6/1-10, MH520091.1; Ych, MK173035); The amino acid sequence identities were highlighted with the gray background.

**Table S8.** Nucleotide and amino acid sequence identities of protein  $\sigma$ A of the isolate Ych to representative members of avian reovirus (%)

| Virus                       | 1    | 2    | 3    | 4    | 5    | 6    | 7    | 8    | 9    |
|-----------------------------|------|------|------|------|------|------|------|------|------|
| 1.S1133 <sup>a</sup>        | ***  | 91.3 | 77.5 | 77.1 | 77.0 | 76.4 | 76.4 | 63.5 | 63.6 |
| 2.D1246 <sup>b</sup>        | 96.9 | ***  | 77.5 | 77.9 | 77.4 | 77.1 | 77.3 | 62.5 | 63.7 |
| 3.ZJ00M <sup>c</sup>        | 91.6 | 91.8 | ***  | 88.7 | 88.8 | 89.8 | 86.6 | 63.2 | 63.8 |
| 4.HC <sup>c</sup>           | 91.4 | 91.6 | 98.3 | ***  | 97.0 | 95.3 | 87.8 | 64.4 | 64.3 |
| 5.03G <sup>c</sup>          | 90.9 | 91.1 | 97.6 | 99.3 | ***  | 95.4 | 87.8 | 64.0 | 64.1 |
| 6.ZJ2000M <sup>d</sup>      | 91.1 | 91.4 | 98.6 | 99.3 | 98.6 | ***  | 88.8 | 64.4 | 64.3 |
| 7.D20/99 <sup>d</sup>       | 90.4 | 90.9 | 96.4 | 96.6 | 95.9 | 96.9 | ***  | 63.9 | 63.9 |
| 8.D2533/6/1-10 <sup>e</sup> | 66.7 | 66.7 | 66.4 | 67.1 | 66.9 | 66.9 | 66.9 | ***  | 89.6 |
| 9.Ych <sup>e</sup>          | 66.9 | 66.9 | 66.7 | 67.4 | 67.1 | 67.1 | 67.1 | 96.4 | ***  |

<sup>a</sup>chicken (S1133, KF741763.1) origin ARV; <sup>b</sup>turkey (D1246, KR997916.1) origin ARV; <sup>c</sup>“novel” waterfowl origin ARVs: Muscovy duck (ZJ00M, KF154117.1), Pekin duck (HC) and Goose (03G, JX145335.1); <sup>d</sup>“classical” waterfowl origin ARVs: Muscovy duck (ZJ2000M, KF306088.1) and Goose (D20/99, KF809669.1); <sup>e</sup>new emerge duck reovirus: Pekin duck (D2533/6/1-10, MH520092.1; Ych, MK173036); The amino acid sequence identities were highlighted with the gray background.

**Table S9.** Nucleotide and amino acid sequence identities of protein  $\sigma$ B of the isolate Ych to representative members of avian reovirus (%)

| Virus                       | 1    | 2    | 3    | 4    | 5    | 6    | 7    | 8    | 9    |
|-----------------------------|------|------|------|------|------|------|------|------|------|
| 1.S1133 <sup>a</sup>        | ***  | 71.6 | 66.0 | 66.5 | 66.0 | 60.7 | 60.2 | 56.2 | 55.8 |
| 2.D1246 <sup>b</sup>        | 77.7 | ***  | 66.3 | 66.7 | 66.6 | 61.1 | 61.1 | 58.4 | 58.7 |
| 3.ZJ00M <sup>c</sup>        | 69.0 | 68.5 | ***  | 98.0 | 94.8 | 66.6 | 65.6 | 62.3 | 61.2 |
| 4.HC <sup>c</sup>           | 69.3 | 69.8 | 97.3 | ***  | 95.9 | 66.6 | 65.8 | 62.2 | 61.1 |
| 5.03G <sup>c</sup>          | 69.0 | 70.1 | 94.6 | 96.5 | ***  | 66.6 | 66.0 | 61.4 | 60.8 |
| 6.ZJ2000M <sup>d</sup>      | 62.0 | 63.3 | 69.3 | 70.4 | 69.6 | ***  | 93.2 | 58.8 | 59.2 |
| 7.D20/99 <sup>d</sup>       | 60.6 | 62.0 | 68.8 | 69.8 | 69.3 | 94.0 | ***  | 58.7 | 59.1 |
| 8.D2533/6/1-10 <sup>e</sup> | 53.3 | 55.2 | 58.7 | 59.8 | 59.8 | 55.7 | 56.0 | ***  | 91.8 |
| 9.Ych <sup>e</sup>          | 52.4 | 55.4 | 59.2 | 60.3 | 60.3 | 56.2 | 56.5 | 97.6 | ***  |

<sup>a</sup>chicken (S1133, KF741764.1) origin ARV; <sup>b</sup>turkey (D1246, KR997917.1) origin ARV; <sup>c</sup>“novel” waterfowl origin ARVs: Muscovy duck (ZJ00M, KF154118.1), Pekin duck (HC) and Goose (03G, JX145336.1); <sup>d</sup>“classical” waterfowl origin ARVs: Muscovy duck (ZJ2000M, KF306089.1) and Goose (D20/99, KF809670.1); <sup>e</sup>new emerge duck reovirus: Pekin duck (D2533/6/1-10, MH520093.1; Ych, MK173037); The amino acid sequence identities were highlighted with the gray background.

**Table S10.** Nucleotide and amino acid sequence identities of protein  $\sigma$ NS of the isolate Ych to representative members of avian reovirus (%)

| Virus                       | 1    | 2    | 3    | 4    | 5    | 6    | 7    | 8    | 9    |
|-----------------------------|------|------|------|------|------|------|------|------|------|
| 1.S1133 <sup>a</sup>        | ***  | 79.5 | 78.3 | 79.9 | 79.9 | 79.5 | 79.7 | 62.2 | 62.2 |
| 2.D1246 <sup>b</sup>        | 92.3 | ***  | 77.5 | 77.4 | 77.6 | 77.3 | 77.0 | 61.0 | 61.6 |
| 3.ZJ00M <sup>c</sup>        | 90.8 | 90.1 | ***  | 94.6 | 94.3 | 85.1 | 91.8 | 61.3 | 61.0 |
| 4.HC <sup>c</sup>           | 91.3 | 90.4 | 98.4 | ***  | 94.7 | 85.3 | 91.5 | 60.9 | 61.3 |
| 5.03G <sup>c</sup>          | 91.8 | 91.0 | 97.8 | 98.9 | ***  | 85.3 | 92.4 | 61.1 | 60.9 |
| 6.ZJ2000M <sup>d</sup>      | 92.7 | 91.2 | 97.3 | 97.3 | 97.3 | ***  | 85.1 | 62.0 | 62.0 |
| 7.D20/99 <sup>d</sup>       | 92.1 | 90.7 | 96.7 | 97.3 | 97.8 | 97.8 | ***  | 61.1 | 61.3 |
| 8.D2533/6/1-10 <sup>e</sup> | 65.5 | 63.8 | 63.6 | 64.1 | 63.9 | 64.4 | 63.9 | ***  | 90.3 |
| 9.Ych <sup>e</sup>          | 64.9 | 63.3 | 63.3 | 63.9 | 63.6 | 64.1 | 63.3 | 97.0 | ***  |

<sup>a</sup>chicken (S1133, KF741765.1) origin ARV; <sup>b</sup>turkey (D1246, KR997918.1) origin ARV; <sup>c</sup>“novel” waterfowl origin ARVs: Muscovy duck (ZJ00M, KF154119.1), Pekin duck (HC) and Goose (03G, JX145337.1); <sup>d</sup>“classical” waterfowl origin ARVs: Muscovy duck (ZJ2000M, KF306090.1) and Goose (D20/99, KF809671.1); <sup>e</sup>new emerge duck reovirus: Pekin duck (D2533/6/1-10, MH520094.1; Ych, MK173038); The amino acid sequence identities were highlighted with the gray background.
